# Supplementary material for: COVID-19 and Hospital Financial Viability in the US
Source: PubMed Central journal article supplement (PMC9107033; doi:10.1001/jamahealthforum.2022.1018), 2022-05-13
Supplement: jamahealthforum-e221018-s001.pdf [file jamahealthforum-e221018-s001.pdf]

## Supplemental Online Content

Wang Y, Bai G, Anderson G. COVID-19 and hospital financial viability in the US. *JAMA Health Forum*. 2022;3(5):e221018. doi:10.1001/jamahealthforum.2022.1018

**eTable 1.** Distribution of Medicare-certified General Acute Care Hospitals, by Fiscal Year Starting Month, 2019 vs. 2020

**eTable 2.** Sample Description

This supplemental material has been provided by the authors to give readers additional information about their work.

**eTable 1: Distribution of Medicare-certified General Acute Care Hospitals, by Fiscal Year Starting Month, 2019 vs. 2020 (data collected on February 2, 2022)**

| <b>Fiscal year beginning</b> | <b>2019 # hospitals (proportion)</b> | <b>2020 # available hospitals</b> |
|------------------------------|--------------------------------------|-----------------------------------|
| January 1                    | 1,715 (39%)                          | 1,695                             |
| February 1                   | 27 (1%)                              | 22                                |
| March 1                      | 30 (1%)                              | 30                                |
| April 1                      | 106 (2%)                             | 106                               |
| May 1                        | 67 (2%)                              | 64                                |
| June 1                       | 74 (2%)                              | 77                                |
| July 1                       | 1,366 (31%)                          | 964                               |
| August 1                     | 33 (1%)                              | 5                                 |
| September 1                  | 91 (2%)                              | 2                                 |
| October 1                    | 790 (18%)                            | 781                               |
| November 1                   | 37 (1%)                              | 41                                |
| December 1                   | 24 (1%)                              | 29                                |
| <b>Total</b>                 | <b>4,360 (100%)</b>                  | <b>3,816</b>                      |

<sup>a</sup> Hospitals with Medicare Cost Reports available as of February 2, 2022.

**eTable 2: Sample Description**

| <b>Description</b>                                                              | <b># hospital-year observation</b> |
|---------------------------------------------------------------------------------|------------------------------------|
| Hospital-years with fiscal years starting on January 1, 2016-2020               | 8,541                              |
| -Hospital-years with missing financial performance measures                     | (315)                              |
| -Hospital-years with charge-to-cost ratio less than 0.2 or greater than 15.0    | (11)                               |
| -Hospital-years with expense-to-revenue ratio less than 0.5 or greater than 3.0 | (43)                               |
| -Hospital-years without five-year continuous observations for the same hospital | (1,282)                            |
| <b>Final sample</b>                                                             | <b>6,890<sup>a</sup></b>           |

<sup>a</sup> The 6,890 hospital-year observations represent 1,378 unique hospitals, all of which have continuous observations during 2016-2020.
